# Supplementary material for: Ammonium-, phosphonium- and sulfonium-based 2-cyanopyrrolidine ionic liquids for carbon dioxide fixation
Source: Royal Society of Chemistry journal article supplement (doi:10.1039/d2cp00177b), 2022-01-01
Supplement: d2cp00177b1.pdf [file d2cp00177b1.pdf]

# **SUPPLEMENTARY INFORMATION**

## **AMMONIUM-, PHOSPHONIUM- AND SULFONIUM-BASED 2-CYANOPYRROLIDINE IONIC LIQUIDS FOR CARBON DIOXIDE FIXATION**

Vitaly V. Chaban,<sup>1</sup> Nadezhda A. Andreeva,<sup>2</sup> and Iuliia V. Voroshylova<sup>3</sup>

(1) Yerevan State University, Yerevan, Armenia.

(2) Peter the Great St. Petersburg Polytechnic University, Saint Petersburg, Russian Federation.

(3) LAQV@REQUIMTE, Faculdade de Ciências, Universidade do Porto, Departamento de Química e Bioquímica, Rua do Campo Alegre, 4169-007 Porto, Portugal.

Table S1. The main vibration bands of all of the investigated cations in comparison with experimental data<sup>1,2</sup>. Abbreviations: “sm” – symmetric stretching; “as” – anti-symmetric stretching; “sc” – scissoring; “st” – stretching.

| Bond              | Frequencies, cm <sup>-1</sup> |            |            |              | Experimental data               |
|-------------------|-------------------------------|------------|------------|--------------|---------------------------------|
|                   | N0                            | N2         | N3         | N4           |                                 |
| O-H               | n/a                           | n/a        | 101<br>157 | 89<br>152    | Non-covalent                    |
| N-O <sub>sm</sub> | n/a                           | 239        | 193        | 210          | Non-covalent                    |
| C-CO <sub>2</sub> | n/a                           | 816        | 834        | 841<br>841   | 900-980*                        |
| C-N               | 864                           | 828<br>971 | 855        | 753          | 800-950**                       |
| C-O <sub>sm</sub> | n/a                           | 1322       | 1334       | 1333<br>1337 | 1200-1350*<br>(C-O alkyl group) |
| C-H <sub>sc</sub> | 1529                          | 1543       | 1545       | 1498<br>1504 | not used                        |
| C-O <sub>as</sub> | n/a                           | 1747       | 1693       | 1697<br>1707 | 1670-1720*<br>(C=O st)          |
|                   | P0                            | P2         | P3         | P4           |                                 |
| O-H               | n/a                           | 54         | 54         | 26-54        | Non-covalent                    |
| P-O <sub>sm</sub> | n/a                           | 159        | 200        | 158          | Non-covalent                    |
| C-CO <sub>2</sub> | n/a                           | 914        | 914        | 810<br>822   | 900-980*                        |
| C-P               | 1005                          | 995        | 632<br>992 | 480          | 900-950***                      |
| C-O <sub>sm</sub> | n/a                           | 1333       | 1333       | 1305<br>1318 | 1200-1350*<br>(C-O alkyl group) |
| C-H <sub>sc</sub> | 1350-1428                     | 1353-1483  | 1450-1483  | 1401-1514    | not used                        |

|                   |           |               |           | 1696<br>1707             | 1670-1720*<br>C=O st               |
|-------------------|-----------|---------------|-----------|--------------------------|------------------------------------|
|                   | S0        | S2            | S3        | S4                       |                                    |
| C-O <sub>as</sub> | n/a       | 1746          | 1746      |                          |                                    |
| O-H               | n/a       | 51            | 50        | 17<br>33                 | Non-covalent                       |
| S-O <sub>sm</sub> | n/a       | 186           | 218       | 127<br>172               | Non-covalent                       |
| C-CO <sub>2</sub> | n/a       | 804           | 819       | 612<br>623<br>824<br>825 | 900-980*                           |
| C-S               | 662-702   | no pronounced | 581-615   | 389-424                  | 600*****                           |
| C-O <sub>sm</sub> | n/a       | 1311          | 1342      | 1320<br>1327             | 1200-1350*<br>(C-O alkyl<br>group) |
| C-H <sub>sc</sub> | 1426-1498 | 1362-1494     | 1360-1492 | 1343-1509                | not used                           |
| C-O <sub>as</sub> | n/a       | 1752          | 1726      | 1704<br>1713             | 1670-1720*<br>C=O st               |

\*Acetic acid, \*\*Tetramethylammonium Chloride, \*\*\*Tetrabutylphosphonium bromide, \*\*\*\*Ethanethiol.

## REFERENCES

- (1) NIST Chemistry WebBook. <https://webbook.nist.gov>, 2022.
- (2) Beauchamp Spectroscopy Tables, 2009.
